# Supplementary material for: Unveiling the heavy-metal ion critical role in γ-dicalcium silicate: from solidification to early hydration
Source: Royal Society of Chemistry journal article supplement (doi:10.1039/d4ra01214c), 2024-01-01
Supplement: d4ra01214c1.pdf [file d4ra01214c1.pdf]

Supplementary Information

**Unveiling the heavy-metal ion critical role in  $\gamma$ -dicalcium silicate:  
From solidification to early hydration**

Heyu Lu<sup>1</sup>, Zhaohui Liu<sup>1</sup>, Xiao Zhi<sup>2</sup>, Jiayuan Ye<sup>3</sup>, Jieshuo Wan<sup>1</sup>, Daizhixuan Ai<sup>1</sup>,  
Neng Li<sup>1,\*</sup>

<sup>1</sup>State Key Laboratory of Silicate Materials for Architectures, Wuhan University of  
Technology, Wuhan 430070, China

<sup>2</sup>China National Building Materials Group Corp., Beijing 100036, China

<sup>3</sup>State Key Laboratory of Green Building Materials, China Building Materials Academy,  
Beijing 100024, China

\*Corresponding Author: Neng Li, E-mail: [lineng@whut.edu.cn](mailto:lineng@whut.edu.cn)

---

| Supplementary Information                                                                                                                                                             | Pages |
|---------------------------------------------------------------------------------------------------------------------------------------------------------------------------------------|-------|
| Table S1. Crystal structure parameters for each configuration following geometry optimization                                                                                         | P2    |
| Table S2 Bond lengths and angles of adsorbed water molecules on surfaces                                                                                                              | P2    |
| Figure S1 Schematic structures of (a) Ca substitution site and, (b) Si+O substitution site                                                                                            | P3    |
| Figure S2. Density of states (DOS) of Ba-doped $\gamma$ -C <sub>2</sub> S (a), Cd-doped $\gamma$ -C <sub>2</sub> S in Si site (b), Cr-doped $\gamma$ -C <sub>2</sub> S in Ca site(c). | P3    |
| Figure S3. Water adsorption initial (IS) and final state (FS) configurations on pure and Cr-doped $\gamma$ -C <sub>2</sub> S                                                          | P4    |
| Figure S4. Water adsorption final state (FS) configurations on Ba-doped and Cd-doped $\gamma$ -C <sub>2</sub> S                                                                       | P5    |

---

**Table S1.** Crystal structure parameters for each configuration following geometry optimization

|      |      | Volume/Å <sup>3</sup> | a /Å  | b /Å  | c/Å   | Alpha/° | beta/° | gamma/° |
|------|------|-----------------------|-------|-------|-------|---------|--------|---------|
| Prue |      | 1582.41               | 10.25 | 11.34 | 13.62 | 90.00   | 90.00  | 90.00   |
| Cd   | Ca1  | 1581.53               | 10.25 | 11.35 | 13.62 | 90.05   | 89.96  | 89.96   |
|      | Ca2  | 1580.17               | 10.25 | 11.32 | 13.62 | 90.00   | 90.00  | 90.00   |
|      | Si   | 1598.19               | 10.33 | 11.36 | 13.63 | 90.00   | 90.00  | 90.09   |
|      | Si+O | 1601.20               | 10.32 | 11.37 | 13.65 | 89.64   | 89.71  | 90.15   |
|      | V    | 1606.79               | 10.29 | 11.45 | 13.64 | 89.98   | 90.09  | 90.15   |
| Ba   | Ca1  | 1598.53               | 10.29 | 11.35 | 13.69 | 89.64   | 90.22  | 90.24   |
|      | Ca2  | 1602.66               | 10.25 | 11.40 | 13.71 | 90.00   | 90.00  | 90.08   |
|      | Si   | 1607.10               | 10.38 | 11.38 | 13.60 | 90.00   | 90.00  | 89.89   |
|      | Si+O | 1603.95               | 10.33 | 11.36 | 13.67 | 89.54   | 89.98  | 90.16   |
|      | V    | 1617.83               | 10.28 | 11.51 | 13.69 | 89.65   | 90.35  | 90.55   |
| Cr   | Ca1  | 1574.30               | 10.22 | 11.36 | 13.56 | 90.22   | 90.13  | 90.16   |
|      | Ca2  | 1570.95               | 10.25 | 11.27 | 13.61 | 90.00   | 90.00  | 90.29   |
|      | Si   | 1587.51               | 10.27 | 11.35 | 13.62 | 90.00   | 90.00  | 89.99   |
|      | Si+O | 1589.55               | 10.27 | 11.35 | 13.64 | 89.94   | 89.87  | 90.09   |
|      | V    | 1600.35               | 10.27 | 11.42 | 13.66 | 90.04   | 89.99  | 90.02   |

**Table S2.** Bond lengths and angles of adsorbed water molecules on surfaces

| Site     | H <sub>w</sub> -O <sub>s</sub> /Å | Ca-O <sub>w</sub> /Å | H <sub>w</sub> -O <sub>w</sub> /Å | ∠HOH/deg |
|----------|-----------------------------------|----------------------|-----------------------------------|----------|
| Pure-I   | 1.47                              | 2.56                 | 1.07                              | 103.50   |
| Pure-II  | 1.47                              | 2.42                 | 1.07                              | 108.38   |
| Pure-III | 1.69                              | 2.46                 | 1.01                              | 96.15    |
| Pure-IV  | 0.97                              | 2.35                 | 2.55                              | /        |
| Cr-I     | 1.49                              | 2.40                 | 1.06                              | 110.25   |
| Cr-II    | 1.52                              | 2.40                 | 1.06                              | 109.96   |
| Cr-III   | 1.68                              | 2.46                 | 1.01                              | 96.10    |
| Cr-IV    | 1.81                              | 2.49                 | 1.00                              | 95.17    |

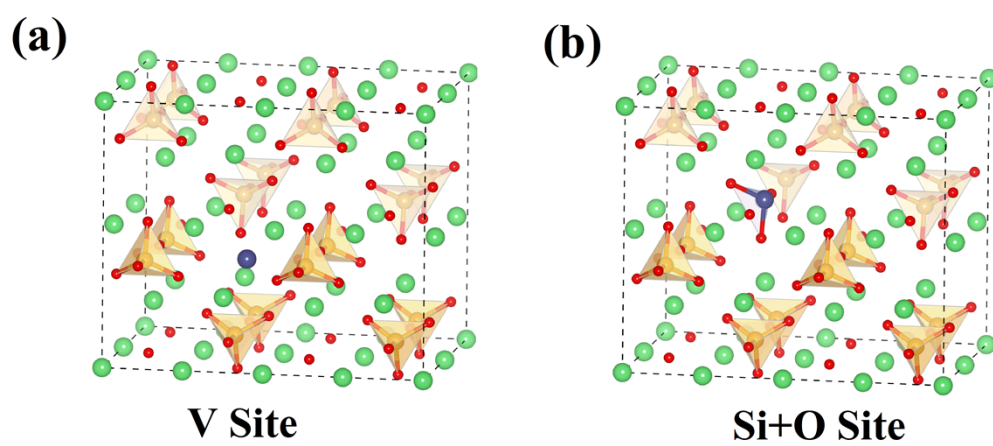

**Figure S1. Schematic structures: (a) Ca substitution site and, (b) Si+O substitution site**

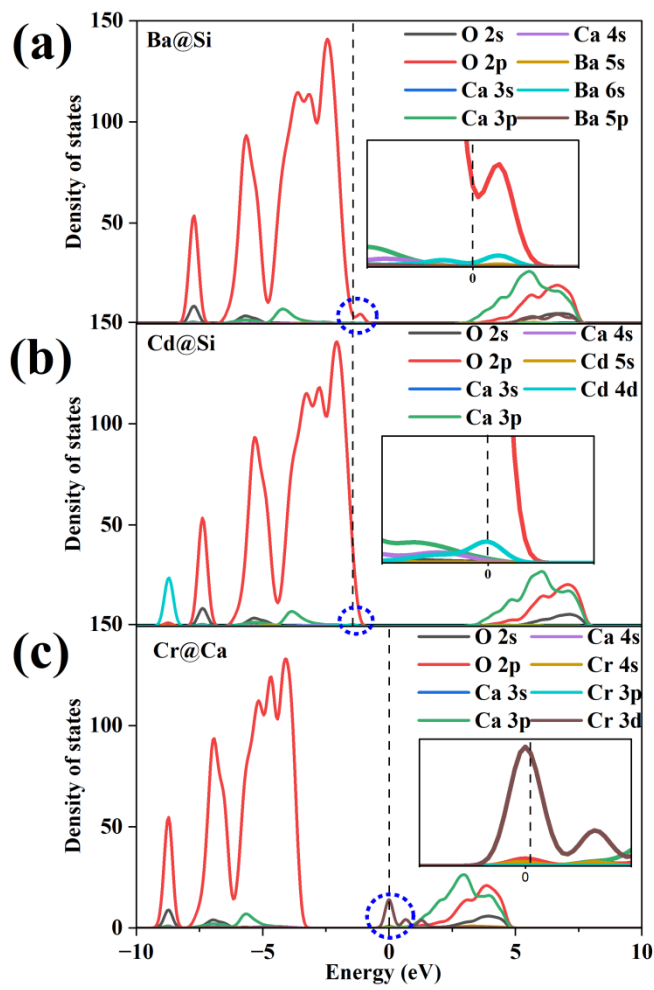

**Figure S2. Density of states (DOS): (a) Ba-doped  $\gamma$ - $C_2S$ , (b) Cd-doped  $\gamma$ - $C_2S$  in Si site, (c) Cr-doped  $\gamma$ - $C_2S$  in Ca site.**

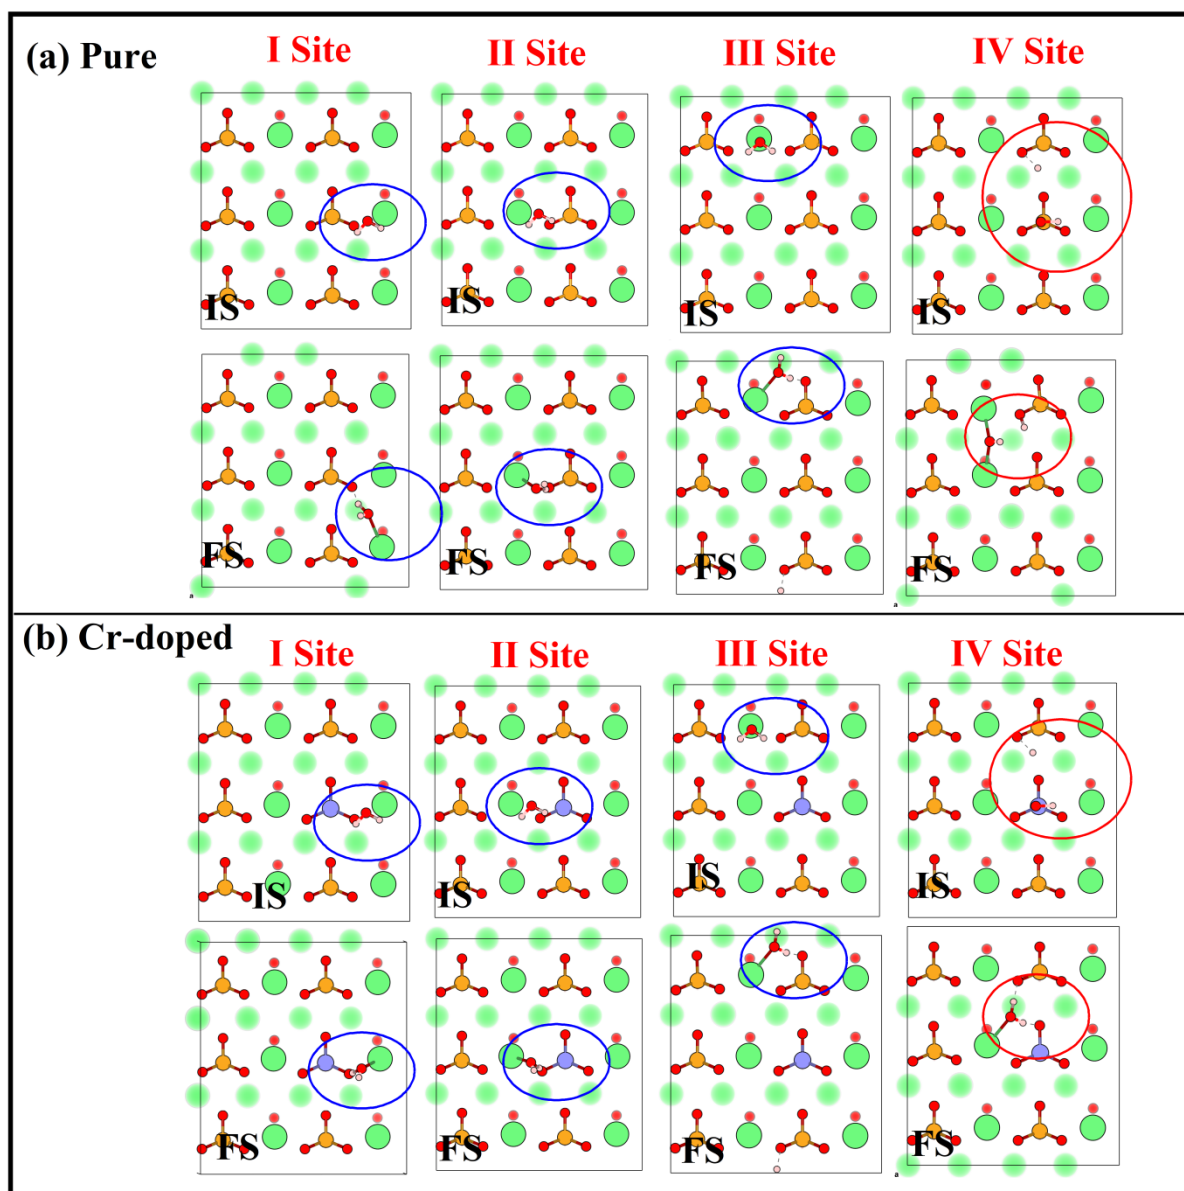

**Figure S3.** Water adsorption initial (IS) and final state (FS) configurations: (a) pure  $\gamma$ - $C_2S$ , (b) Cr-doped  $\gamma$ - $C_2S$

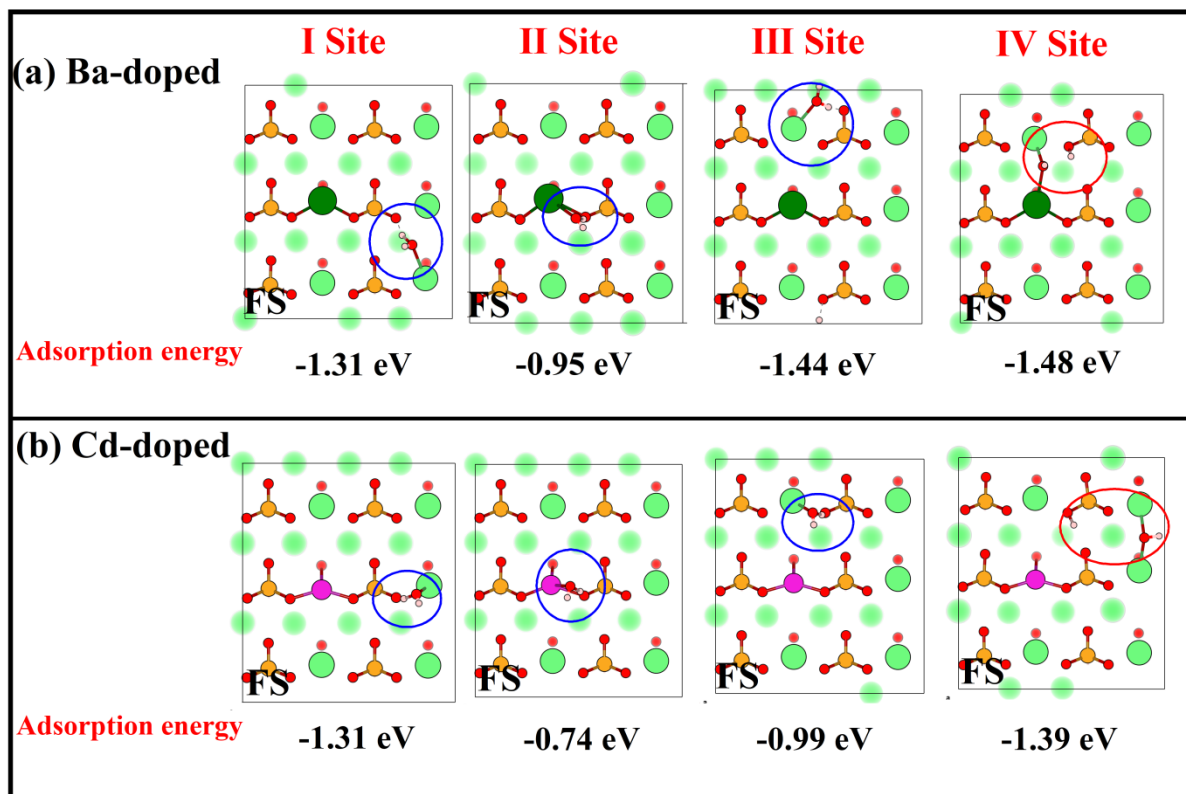

**Figure S4.** Water adsorption final state (FS) configurations: (a) Ba-doped, (b) Cd-doped  $\gamma$ -C<sub>2</sub>S
